# Supplementary material for: Lycopene Maintains Mitochondrial Homeostasis to Counteract the Enterotoxicity of Deoxynivalenol
Source: MDPI journal article supplement (doi:10.3390/antiox12111958), 2023-11-02

**Table S1. Sequences of oligonucleotide primers for qRT-PCR.**

| Gene Names | Sequence (5' → 3')        | NCBI Reference Sequence | Amplicon size (bp) |
|------------|---------------------------|-------------------------|--------------------|
| GAPDH1     | GTCGGAGTGAACGGATTTGGC     | NM_001289745.3          | 150                |
|            | CTTGCCGTGGGTGGAATCAT      |                         |                    |
| GAPDH2     | AGTATGATTCCACCCACGGC      | NM_001256799.3          | 139                |
|            | TACGTAGCACCAGCATCACC      |                         |                    |
| Occludin   | GACAGACTACACAACCTGGCGG    | NM_001302926.2          | 662                |
|            | TGTACTCCTGCAGGCCACTG      |                         |                    |
| N-Cad      | CTTCATGCTGGTGGTGTCTTGG    | NM_000165.5             | 149                |
|            | CACAGTCTTTGGCAGGGCTCAG    |                         |                    |
| Claudin    | CCATCGTCAGCACCCGCACTG     | NM_001244539.1          | 107                |
|            | CGACACGCAGGACATCCACAG     |                         |                    |
| OPA1       | ACAGAGGATGGTGCTTGTTGAC    | XM_047448216.1          | 130                |
|            | CAGTATGATGGCGTTGGGATT     |                         |                    |
| Mfn1       | AGAAAGCACAAAGCACAGGGGATG  | XM_011512963.4          | 126                |
|            | CACTGCTGACTGCGAGATACTC    |                         |                    |
| Mfn2       | GCCACACCACCAACTGCTTCC     | XM_047436156.1          | 96                 |
|            | TCTTGACGCTCCTCTTCTCCTCTG  |                         |                    |
| Dnm1l      | TCTGAATCTGGTGGGCATGATTGC  | XM_001928848.6          | 91                 |
|            | CTCCGCAGTAAAGGACTCGAAGTG  |                         |                    |
| Fis1       | CTACCCAAAGGGAGCAAAGAG     | NM_016068.3             | 250                |
|            | GTCCAATGAGTCCAGCCAGTC     |                         |                    |
| MIEF1      | CAGCCGACCACATCCAACCT      | NM_001394030.1          | 271                |
|            | CGAATCACATAGTCCAAGAGGG    |                         |                    |
| MFF        | GACCTCCTCCAACCCCTCAAAATG  | XM_047445133.1          | 104                |
|            | GACTAGCTGTCCATTCTGGCGAAC  |                         |                    |
| Parkin     | GTGGTTCTGCGGTGGATTCTGAG   | NM_001044603.2          | 104                |
|            | TTACTGCCTGTGGTTCTTTGGGAAG |                         |                    |
| PINK1      | CAGGAGCGGTCCCAAGCA        | NM_032409.3             | 246                |
|            | GTCATCACAGTGGCGAGGC       |                         |                    |
| LC3B       | TGCCCTCAGACCGGCCTTTCAAGCA | XM_047440559.1          | 310                |
|            | TCCTTCTCCTGCTCATAGATGTCCG |                         |                    |
| P62        | CGATGGCGATGTCGTATGTG      | XM_003123639.4          | 244                |
|            | TTGCTGTGCTCCTTGTGAATG     |                         |                    |

|        |                         | Dnm11  | Fis1   | Mief1  | Mff    | Mfn1  | Mfn2   | Opa1   | PINK1  | Parkin | LC3    | P62    | Occludin | N-cad   | ZO-1    | Claudin |
|--------|-------------------------|--------|--------|--------|--------|-------|--------|--------|--------|--------|--------|--------|----------|---------|---------|---------|
| Dnm11  | Pearson correlation     | 1      | .372   | .528*  | .685** | .440  | .505*  | .510*  | .716** | .655** | .740** | .669** | -.635**  | -.492   | -.771** | .139    |
|        | Significant (Bilateral) |        | .156   | .035   | .003   | .088  | .046   | .044   | .002   | .006   | .001   | .005   | .008     | .053    | .000    | .608    |
|        | N                       | 16     | 16     | 16     | 16     | 16    | 16     | 16     | 16     | 16     | 16     | 16     | 16       | 16      | 16      | 16      |
| Fis1   | Pearson correlation     | .372   | 1      | .337   | .318   | .068  | .250   | .182   | .740** | .437   | .716** | .465   | -.552*   | -.438   | -.438   | .344    |
|        | Significant (Bilateral) | .156   |        | .202   | .229   | .803  | .350   | .501   | .001   | .090   | .002   | .069   | .027     | .090    | .089    | .192    |
|        | N                       | 16     | 16     | 16     | 16     | 16    | 16     | 16     | 16     | 16     | 16     | 16     | 16       | 16      | 16      | 16      |
| Mief1  | Pearson correlation     | .528*  | .337   | 1      | .322   | .549* | .813*  | .319   | .658** | .764** | .815** | .819** | -.811**  | -.797** | -.712** | -.143   |
|        | Significant (Bilateral) | .035   | .202   |        | .224   | .028  | .000   | .228   | .006   | .001   | .000   | .000   | .000     | .000    | .002    | .598    |
|        | N                       | 16     | 16     | 16     | 16     | 16    | 16     | 16     | 16     | 16     | 16     | 16     | 16       | 16      | 16      | 16      |
| Mff    | Pearson correlation     | .685** | .318   | .322   | 1      | .567* | .440   | .199   | .493   | .389   | .533*  | .221   | -.438    | -.239   | -.568*  | .274    |
|        | Significant (Bilateral) | .003   | .229   | .224   |        | .022  | .088   | .461   | .053   | .136   | .034   | .410   | .090     | .373    | .022    | .304    |
|        | N                       | 16     | 16     | 16     | 16     | 16    | 16     | 16     | 16     | 16     | 16     | 16     | 16       | 16      | 16      | 16      |
| Mfn1   | Pearson correlation     | .440   | .068   | .549*  | .567*  | 1     | .520*  | .067   | .292   | .408   | .471   | .225   | -.417    | -.471   | -.533*  | .095    |
|        | Significant (Bilateral) | .088   | .803   | .028   | .022   |       | .039   | .806   | .272   | .117   | .066   | .402   | .108     | .065    | .033    | .727    |
|        | N                       | 16     | 16     | 16     | 16     | 16    | 16     | 16     | 16     | 16     | 16     | 16     | 16       | 16      | 16      | 16      |
| Mfn2   | Pearson correlation     | .505*  | .250   | .813** | .440   | .520* | 1      | -.009  | .648** | .481   | .644** | .694** | -.717**  | -.458   | -.565*  | -.099   |
|        | Significant (Bilateral) | .046   | .350   | .000   | .088   | .039  |        | .974   | .007   | .059   | .007   | .003   | .002     | .075    | .023    | .716    |
|        | N                       | 16     | 16     | 16     | 16     | 16    | 16     | 16     | 16     | 16     | 16     | 16     | 16       | 16      | 16      | 16      |
| Opa1   | Pearson correlation     | .510*  | .182   | .319   | .199   | .067  | -.009  | 1      | .207   | .628** | .487   | .445   | -.285    | -.263   | -.233   | .015    |
|        | Significant (Bilateral) | .044   | .501   | .228   | .461   | .806  | .974   |        | .442   | .009   | .056   | .084   | .284     | .326    | .384    | .955    |
|        | N                       | 16     | 16     | 16     | 16     | 16    | 16     | 16     | 16     | 16     | 16     | 16     | 16       | 16      | 16      | 16      |
| PINK1  | Pearson correlation     | .716** | .740** | .658** | .493   | .292  | .648** | .207   | 1      | .724** | .868** | .839** | -.770**  | -.723** | -.820** | .348    |
|        | Significant (Bilateral) | .002   | .001   | .006   | .053   | .272  | .007   | .442   |        | .002   | .000   | .000   | .000     | .002    | .000    | .187    |
|        | N                       | 16     | 16     | 16     | 16     | 16    | 16     | 16     | 16     | 16     | 16     | 16     | 16       | 16      | 16      | 16      |
| Parkin | Pearson correlation     | .655** | .437   | .764** | .389   | .408  | .481   | .628** | .724** | 1      | .851** | .846** | -.552*   | -.790** | -.814** | .177    |
|        | Significant (Bilateral) | .006   | .090   | .001   | .136   | .117  | .059   | .009   | .002   |        | .000   | .000   | .027     | .000    | .000    | .512    |
|        | N                       | 16     | 16     | 16     | 16     | 16    | 16     | 16     | 16     | 16     | 16     | 16     | 16       | 16      | 16      | 16      |
| LC3    | Pearson correlation     | .740** | .716** | .815** | .533*  | .471  | .644** | .487   | .868** | .851** | 1      | .813** | -.829**  | -.775** | -.806** | .260    |
|        | Significant (Bilateral) | .001   | .002   | .000   | .034   | .066  | .007   | .056   | .000   | .000   |        | .000   | .000     | .000    | .000    | .331    |
|        | N                       | 16     | 16     | 16     | 16     | 16    | 16     | 16     | 16     | 16     | 16     | 16     | 16       | 16      | 16      | 16      |
| P62    | Pearson correlation     | .669** | .465   | .819** |        |       |        |        |        |        |        |        |          |         |         |         |

Figure S1. Original western blot gels used in the study.

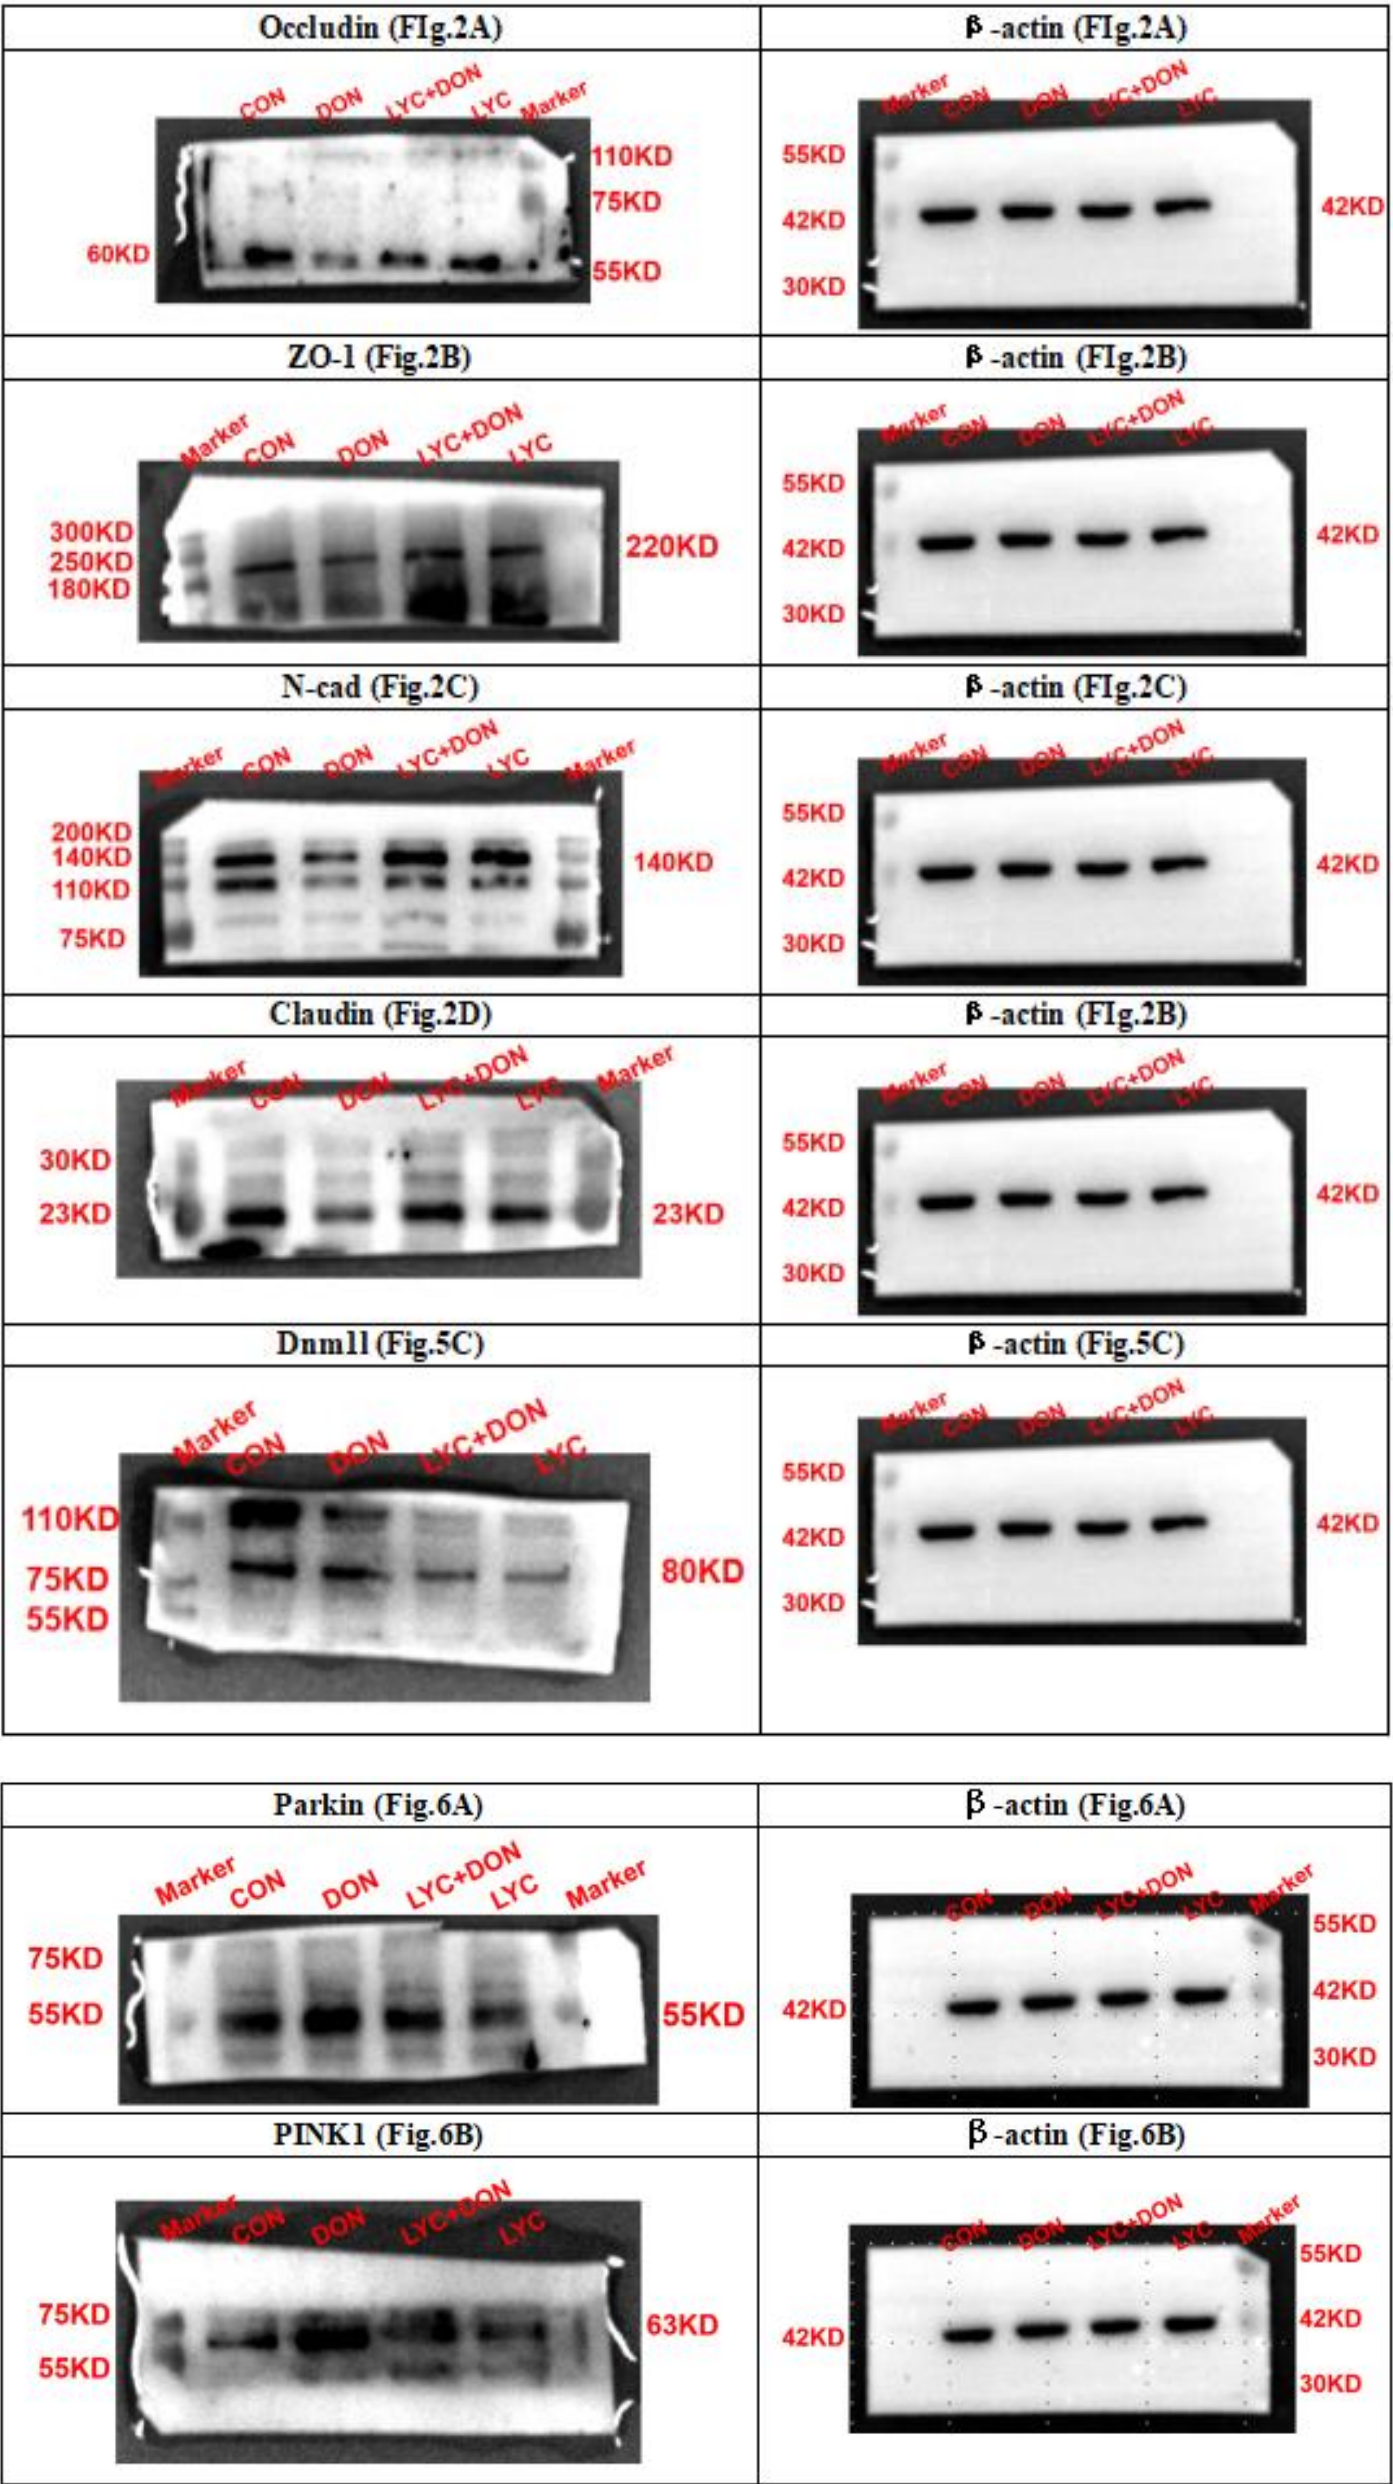

Supplement: s1 [file s1]
